# Supplementary material for: Grafting of a Eu3+-tfac complex on to a Tb3+-metal organic framework for use as a ratiometric thermometer
Source: Royal Society of Chemistry journal article supplement (doi:10.1039/c7dt02042b), 2017-01-01
Supplement: c7dt02042b1.pdf [file c7dt02042b1.pdf]

## Supporting Information

### **Grafting of a Eu<sup>3+</sup>-tfac complex on to a Tb<sup>3+</sup>-metal organic framework for use as a ratiometric thermometer**

Anna M. Kaczmarek,<sup>a,\*</sup> Ying-Ya Liu,<sup>b</sup> Chunhua Wang,<sup>b</sup> Brecht Laforce,<sup>c</sup> Laszlo Vincze,<sup>c</sup> Pascal Van Der Voort,<sup>d</sup> Rik Van Deun<sup>a,\*</sup>

#### **Synthesis of Eu(tfac)<sub>3</sub>·2H<sub>2</sub>O**

The lanthanide β-diketonate complexes were synthesized according to known procedures.<sup>1,2</sup> In a flask 2.65 mmol of the β-diketonate ligand and 2 mmol of NaOH were dissolved in 20 ml of methanol and stirred for 15 minutes. Next, 0.65 mmol of a LnCl<sub>3</sub>·6H<sub>2</sub>O salt is added and the solution is stirred for 24h at room temperature. After 24h water is added and a suspension forms immediately. The suspension is filtered off, washed with H<sub>2</sub>O and dried in air.

Elemental analysis: (%) Calcd for C<sub>15</sub>H<sub>16</sub>EuF<sub>9</sub>O<sub>2</sub>: C, 32.68; H, 2.93%. Found: C, 32.89; H, 3.05%.

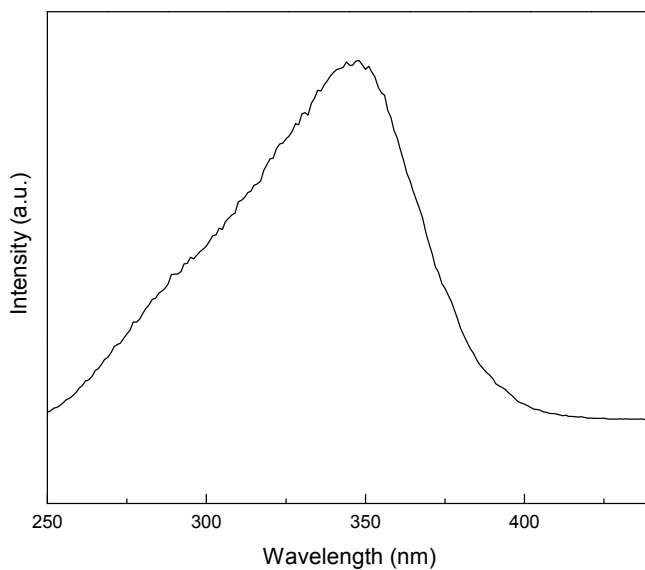

Fig. S1 Excitation spectrum of the TbMOF (observed at 542.0 nm).

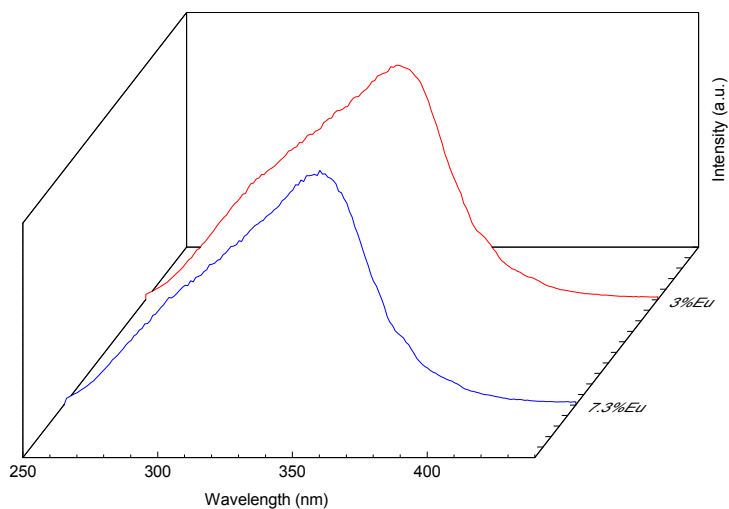

Fig. S2 Excitation spectra of the TbMOF@3%Eu\_tfac (3%Eu) and TbMOF@7.3%Eu\_tfac (7.3%Eu) compounds (observed at 542.0 nm).

Table S1. CIE color coordinates (x, y) calculated at different temperatures for TbMOF parent compound

| Temperature [K] | x coordinate | y coordinate |
|-----------------|--------------|--------------|
| 250             | 0.283        | 0.442        |
| 260             | 0.277        | 0.431        |
| 270             | 0.272        | 0.421        |
| 280             | 0.272        | 0.418        |
| 290             | 0.271        | 0.419        |
| 300             | 0.275        | 0.429        |
| 310             | 0.274        | 0.428        |
| 320             | 0.269        | 0.415        |
| 330             | 0.262        | 0.397        |
| 340             | 0.255        | 0.377        |
| 350             | 0.248        | 0.351        |
| 360             | 0.237        | 0.312        |
| 370             | 0.226        | 0.275        |
| 380             | 0.217        | 0.244        |

Table S2. CIE color coordinates (x, y) calculated at different temperatures for TbMOF@3%Eu\_tfac compound

| Temperature [K] | x coordinate | y coordinate |
|-----------------|--------------|--------------|
| 225             | 0.275        | 0.312        |
| 250             | 0.321        | 0.347        |
| 275             | 0.328        | 0.321        |
| 300             | 0.328        | 0.302        |
| 325             | 0.328        | 0.295        |
| 350             | 0.323        | 0.294        |
| 375             | 0.320        | 0.300        |

Table S3. CIE color coordinates (x, y) calculated at different temperatures for TbMOF@7.3%Eu\_tfac compound

| Temperature [K] | x coordinate | y coordinate |
|-----------------|--------------|--------------|
| 200             | 0.375        | 0.477        |
| 225             | 0.375        | 0.467        |
| 250             | 0.379        | 0.453        |
| 275             | 0.384        | 0.428        |
| 300             | 0.386        | 0.395        |
| 325             | 0.384        | 0.360        |

Table S4. Relative Ln<sup>3+</sup> (Tb<sup>3+</sup>, Eu<sup>3+</sup>) contents for the samples during synthesis (calcd.) and as determined by WDXRF.

| Sample            | Tb <sup>3+</sup> ion (%) |       | Eu <sup>3+</sup> ion (%) |       |
|-------------------|--------------------------|-------|--------------------------|-------|
|                   | Calcd.                   | WDXRF | Calcd.                   | WDXRF |
| TbMOF@3%Eu_tfac   | 95                       | 97    | 5                        | 3     |
| TbMOF@7.3%Eu_tfac | 90                       | 92.7  | 10                       | 7.3   |

[1] K. Binnemans, P. Lenaerts, K. Driesen and C. Görrler-Walrand, *J. Mater. Chem.* **2004**, *14*, 191.

[2] R. A. Carboni and R. V. Lindsey, *J. Am. Chem. Soc.* **1959**, *81*, 4342.
